# Supplementary material
Source: PubMed Central journal article supplement (PMC7451230)

Supplemental Figure 1

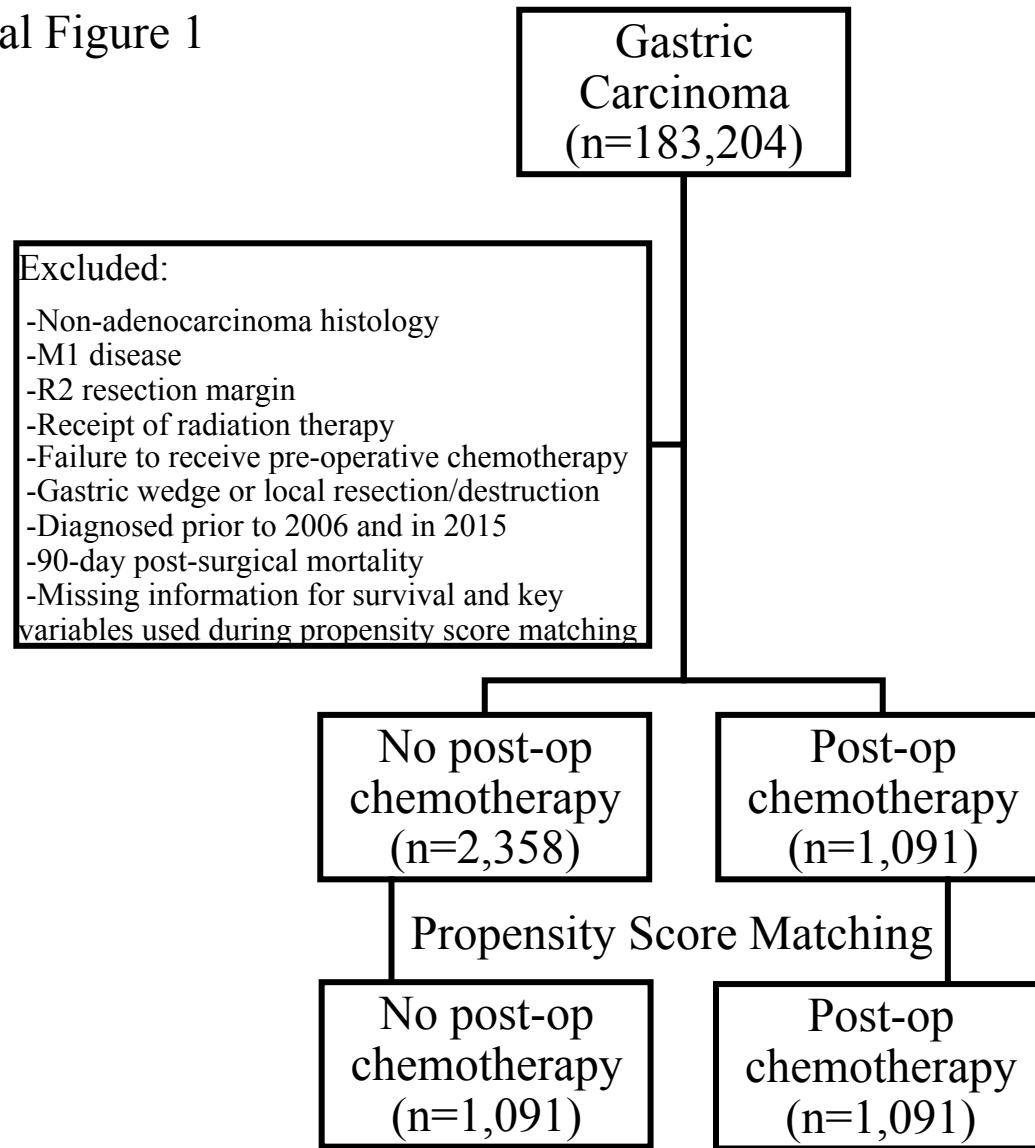

Supplement: 10434_2020_9045_MOESM1_ESM.pdf [file 10434_2020_9045_MOESM1_ESM.pdf]
